# Supplementary material for: Diarrhea prevalence in a randomized, controlled prospective trial of point-of-use water filters in homes and schools in the Dominican Republic
Source: bioRxiv or medRxiv preprint supplement (doi:10.1101/2020.10.21.20217299), 2020-10-23
Supplement: Supplementary file [file media-3.pdf]

**Additional File 3. Prevalence of self-reported diarrhea by home filter status: Intent to Treat Analysis**

| <b>Aggregation</b>          | <b>Before filter in home<sup>1</sup></b><br>% (x/n) | <b>After filter in home<sup>1</sup></b><br>% (x/n) | <b>OR</b><br><b>(95% CI)<sup>2</sup></b> | <b>aOR</b><br><b>(95% CI)<sup>3</sup></b> |
|-----------------------------|-----------------------------------------------------|----------------------------------------------------|------------------------------------------|-------------------------------------------|
| Any member of the household | 25.6%<br>(101/394)                                  | 10.3%<br>(70/681)                                  | 0.26<br>(0.17,0.383)***                  | 0.31 (0.18,0.52)***                       |
| Adults only                 | 17.3%<br>(68/392)                                   | 4.8% (32/666)                                      | 0.07<br>(0.03,0.16)***                   | 0.26 (0.13,0.53)***                       |
| School aged children only   | 12.2%<br>(46/378)                                   | 5.7% (37/648)                                      | 0.22 (0.09,0.5)***                       | 0.41 (0.19,0.86)*                         |
| Children less than 5        | 11.8%<br>(12/102)                                   | 7.1% (12/169)                                      | 0.50 (0.18,1.37)                         | 0.47 (0.12,1.83)                          |

\* $p < 0.05$ ; \*\* $p < 0.01$ , \*\*\* $p < 0.001$

<sup>1</sup>Counts are each measurement of each household and include households reporting no filter usage

<sup>2</sup>Odds Ratio accounting for repeated measures

<sup>3</sup>Adjusting Odds Ratio accounting for repeated measures and adjusted for Household size, Season (Fall, Winter, Spring), Water Source, School Filter Status and Region
